# Supplementary material for: Validity and reliability of the adapted Dutch version of the Brace Questionnaire (BrQ)
Source: PubMed Central journal article supplement — Acta Orthop. 2023 Sep 4;94:460–5. doi: 10.2340/17453674.2023.18492 (PMC10481702; doi:10.2340/17453674.2023.18492), 2023-09-04
Supplement: ActaO-94-18492-s001.pdf [file ActaO-94-18492-s001.pdf]

## BRACE VRAGENLIJST

*De volgende vragenlijst is een vertaalde vragenlijst vanuit het Grieks en bevat vragen over wat je over je gezondheid denkt en voelt. Het is geen test en er zijn geen goede of foute antwoorden*

- *Lees elke vraag aandachtig*
- *Kies het antwoord waarvan jij denkt dat het beste bij je past. Zet een kruisje in het vakje ernaast*

| <i>Voorbeeld</i>                                       | <b>Nooit</b>             | <b>Zelden</b>            | <b>Soms</b>              | <b>Vaak</b> | <b>Continu</b>           |
|--------------------------------------------------------|--------------------------|--------------------------|--------------------------|-------------|--------------------------|
| <b>Gedurende de afgelopen week had ik zin in lezen</b> | <input type="checkbox"/> | <input type="checkbox"/> | <input type="checkbox"/> | <b>x</b>    | <input type="checkbox"/> |

**Zou je ons een paar dingen over jezelf willen vertellen?**

**Je bent:**  een meisje  een jongen    **Leeftijd:** .....jaar

**Datum**.....

| <b>Gedurende de afgelopen 3 maanden...</b>             | <b>Nooit</b>             | <b>Zelden</b>            | <b>Soms</b>              | <b>Vaak</b>              | <b>Continu</b>           |
|--------------------------------------------------------|--------------------------|--------------------------|--------------------------|--------------------------|--------------------------|
| <b>1. Zorgde de brace ervoor dat je je ziek voelde</b> | <input type="checkbox"/> |
| <b>2. Was je bang dat je scoliose erger zou worden</b> | <input type="checkbox"/> |

| <b>Gedurende de afgelopen 3 maanden...</b>           | <b>Nooit</b>             | <b>Zelden</b>            | <b>Soms</b>              | <b>Vaak</b>              | <b>Continu</b>           |
|------------------------------------------------------|--------------------------|--------------------------|--------------------------|--------------------------|--------------------------|
| <b>3. Werd je moe van het lopen vanwege de brace</b> | <input type="checkbox"/> |
| <b>4. Kon je rennen met de brace</b>                 | <input type="checkbox"/> |
| <b>5. Trok je de brace zonder hulp aan</b>           | <input type="checkbox"/> |
| <b>6. Trok je de brace zonder hulp uit</b>           | <input type="checkbox"/> |
| <b>7. Kon je niet goed eten vanwege de brace</b>     | <input type="checkbox"/> |
| <b>8. Kon je niet goed slapen vanwege de brace</b>   | <input type="checkbox"/> |
| <b>9. Kon je niet goed ademen vanwege de brace</b>   | <input type="checkbox"/> |

| <b>Gedurende de afgelopen 3 maanden...</b>                                                                    | <b>Nooit</b>             | <b>Zelden</b>            | <b>Soms</b>              | <b>Vaak</b>              | <b>Continu</b>           |
|---------------------------------------------------------------------------------------------------------------|--------------------------|--------------------------|--------------------------|--------------------------|--------------------------|
| <b>10. Maakte de brace je nerveus</b>                                                                         | <input type="checkbox"/> |
| <b>11. Voelde je je verdrietig vanwege de brace</b>                                                           | <input type="checkbox"/> |
| <b>12. Voelde je je gelukkig</b>                                                                              | <input type="checkbox"/> |
| <b>13. Geloofde je dat je leven met scoliose beter zou zijn geweest als je geen brace zou hebben gedragen</b> | <input type="checkbox"/> |
| <b>14. Geloofde je dat de brace-behandeling nuttig was</b>                                                    | <input type="checkbox"/> |

| <b>Gedurende de afgelopen maand...</b> | <b>Nooit</b>             | <b>Zelden</b>            | <b>Soms</b>              | <b>Vaak</b>              | <b>Continu</b>           |
|----------------------------------------|--------------------------|--------------------------|--------------------------|--------------------------|--------------------------|
| <b>15. Was je trots op jezelf</b>      | <input type="checkbox"/> |
| <b>16. Was je tevreden over jezelf</b> | <input type="checkbox"/> |

| <b>Gedurende de afgelopen maand...</b>                   | <b>Nooit</b>             | <b>Zelden</b>            | <b>Soms</b>              | <b>Vaak</b>              | <b>Continu</b>           |
|----------------------------------------------------------|--------------------------|--------------------------|--------------------------|--------------------------|--------------------------|
| <b>17. Voelde je je sterk en vol energie</b>             | <input type="checkbox"/> |
| <b>18. Voelde je je moe en uitgeput vanwege de brace</b> | <input type="checkbox"/> |

| <b>Gedurende de afgelopen maand...</b>              | <b>Nooit</b>             | <b>Zelden</b>            | <b>Soms</b>              | <b>Vaak</b>              | <b>Continu</b>           |
|-----------------------------------------------------|--------------------------|--------------------------|--------------------------|--------------------------|--------------------------|
| <b>19. Had je moeite in de les vanwege de brace</b> | <input type="checkbox"/> |
| <b>20. Miste je weleens school vanwege de brace</b> | <input type="checkbox"/> |
| <b>21. Lette je niet op in de klas</b>              | <input type="checkbox"/> |

| <b>Gedurende de afgelopen maand...</b>                               | <b>Nooit</b>             | <b>Zelden</b>            | <b>Soms</b>              | <b>Vaak</b>              | <b>Continu</b>           |
|----------------------------------------------------------------------|--------------------------|--------------------------|--------------------------|--------------------------|--------------------------|
| <b>22. Nam je medicijnen omdat je pijn had</b>                       | <input type="checkbox"/> |
| <b>23. Had je 's nachts pijn</b>                                     | <input type="checkbox"/> |
| <b>24. Had je pijn bij het lopen</b>                                 | <input type="checkbox"/> |
| <b>25. Had je pijn bij het zitten</b>                                | <input type="checkbox"/> |
| <b>26. Had je pijn bij het traplopen</b>                             | <input type="checkbox"/> |
| <b>27. Kreeg je door de brace tintelingen in je handen of voeten</b> | <input type="checkbox"/> |

| <b>Gedurende de afgelopen maand...</b>                                                                                     | <b>Nooit</b>             | <b>Zelden</b>            | <b>Soms</b>              | <b>Vaak</b>              | <b>Continu</b>           |
|----------------------------------------------------------------------------------------------------------------------------|--------------------------|--------------------------|--------------------------|--------------------------|--------------------------|
| <b>28. Kon je je vrienden niet zien vanwege de brace</b>                                                                   | <input type="checkbox"/> |
| <b>29. Hadden je vrienden medelijden met je vanwege je rug</b>                                                             | <input type="checkbox"/> |
| <b>30. Voelde je je anders dan je vrienden omdat je een brace draagt</b>                                                   | <input type="checkbox"/> |
| <b>31. Had je problemen met je familie vanwege de brace</b>                                                                | <input type="checkbox"/> |
| <b>32. Geloofde je dat je band met je familie of vrienden beter zou zijn geweest als je geen brace gedragen zou hebben</b> | <input type="checkbox"/> |
| <b>33. Bleef je thuis omdat je je voor de brace schaamde</b>                                                               | <input type="checkbox"/> |
| <b>34. Droeg je speciale kleding vanwege de brace</b>                                                                      | <input type="checkbox"/> |
